## Role of an imbalanced miRNAs axis in pathogenesis of psoriasis: novel perspectives based on review of the literature

Mao-Jie Wang<sup>1</sup>, Yong-Yue Xu<sup>1</sup>, Run-Yue Huang<sup>1,2,3</sup>, Xiu-Min Chen<sup>1</sup>, Hai-Ming Chen<sup>1</sup>, Ling Han<sup>1</sup>, Yu-Hong Yan<sup>1</sup> and Chuan-Jian Lu<sup>1,3</sup>

<sup>1</sup> The Second Affiliated Hospital, Guangzhou University of Chinese Medicine (Guangdong Provincial Hospital of Chinese Medicine), Guangzhou, China

<sup>2</sup> Section of Metabolic Diseases Research, University Medical Centre Utrecht, Utrecht University, Utrecht, The Netherlands

<sup>3</sup> Guangdong Provincial Key Laboratory of Clinical Research on Traditional Chinese Medicine Syndrome, Guangzhou, China

**Correspondence to:** Chuan-Jian Lu, *email:* luchuanjian888@vip.sina.com

Run-Yue Huang, *email:* ry\_huang@hotmail.com

**Keywords:** psoriasis; imbalanced miRNAs axis; cell proliferation; cell differentiation; keratinocytes

**Received:** August 08, 2016

**Accepted:** October 03, 2016

**Published:** October 08, 2016

### ABSTRACT

**BACKGROUND:** Specific profile of microRNAs (miRNAs, miR) expressed in psoriasis has been identified in the past few years, while the studies on roles and molecular mechanisms of these miRNAs are still on the way. In our previous study, four specific miRNAs (miR-31, miR-203, hsa-miR-99a and miR-125b) were found to be specifically altered in psoriatic lesions. We therefore conducted a systematic literature review in this study to reveal the role of these miRNAs in the pathogenesis of psoriasis in order to inform future research.

**METHODS:** The related articles indexed in PubMed (MEDLINE) database were searched and analyzed. We identified eligible studies related to the mechanism research of miR-31, miR-203, hsa-miR-99a and miR-125b in psoriasis or psoriatic lesional skin from inception up to July 2016. The experts in the field of miRNAs and Psoriasis were involved in analysis process.

**RESULT:** Both miR-31 and miR-203 are dramatically upregulated in psoriatic lesions. The former plays the pro-proliferative, pro-differentiative and pro-inflammatory roles and the latter holds the potentials for anti-proliferation, pro-inflammation and pro-differentiation in psoriatic keratinocytes. Conversely, both hsa-miR-99a and miR-125b are significantly downregulated in psoriatic skin. These two miRNAs are able to inhibit proliferation while promote differentiation of psoriatic keratinocytes, and miR-125b can also suppress inflammation in psoriatic lesions. By analyzing the contexts related to these miRNAs, we found that each of them does not act alone but rather work in concert with other miRNAs. The imbalance between miR-31/miR-203 and hsa-miR-99a/miR-125b may contribute to the intense proliferation and abnormal differentiation of psoriatic keratinocytes, which is a characteristic of pathogenesis of psoriasis.

**CONCLUSION:** An imbalanced miRNAs axis was for the first time outlined. Apparently, upregulation of miR-31/miR-203 and downregulation of hsa-miR-99a/miR-125b work together in concert to facilitate the development of psoriasis pathogenesis. Further work in this field holds the potentials to open a new way to study psoriasis.

### INTRODUCTION

Psoriasis is a chronic and complex inflammatory skin

disorder with lesions displaying hyper-proliferative and abnormal differentiation. Psoriasis affects about 2-3% of population worldwide and causes negative consequences

**Table 1: The functions and related molecules of four key miRNAs identified in psoriasis skin**

| MiRNAs      | Region, Tissues or Cells Expressed                                                                                | Target Gene                             | Expression in Psoriasis | Roles of miRNAs in |                 |              | Other Information                                                     | References  |
|-------------|-------------------------------------------------------------------------------------------------------------------|-----------------------------------------|-------------------------|--------------------|-----------------|--------------|-----------------------------------------------------------------------|-------------|
|             |                                                                                                                   |                                         |                         | Proliferation      | Differentiation | Inflammation |                                                                       |             |
| MiR-31      | Psoriatic keratinocytes                                                                                           | ppp6c, STK40, FIH-1,EMP-1               | Up                      | ↑                  | ↑               | ↑            | MiR-31 can be induced by TGF-β1,IL-6 and IL-17A                       | [10-12, 16] |
| MiR-203     | Keratinocytes in Psoriatic lesions; Normal keratinocytes stimulated by combinations of pro-inflammatory cytokines | SOCS-3,p63, LASP1,RAPH1,RAN,TNFα, IL-24 | Up                      |                    | ↑               | ↑            | Skin-specific miRNA; Exclusively expressed in psoriatic keratinocytes | [6, 44, 50] |
| Hsa-miR-99a | Normal skin and psoriatic skin                                                                                    | IGF-1R                                  | Down                    | ↓                  | ↑               | -            | One of the strongest down-regulated miRNAs in psoriatic skin          | [9, 48]     |
| MiR-125b    | Fibroblasts, keratinocytes, and melanocytes                                                                       | FGFR2, p63, Notch 1,TNFα                | Down                    | ↓                  | ↑               | ↓            | One of the most down-regulated miRNAs in psoriasis skin.              | [6, 15, 49] |

ppp6c=protein phosphatase 6; STK40=serine/threonine kinase 40; FIH-1=factor-inhibiting hypoxiainducible factor 1; EMP-1=epithelial membrane protein 1; IGF-1R=insulin-like growth factor 1 receptor; FGFR2=fibroblast growth factor receptor 2; p63=protein 63; TNF=tumor necrosis factor; SOCS-3=suppressor of cytokine signaling 3; LASP1=LIM and SH3 domain protein 1; RAPH1=Ras-associated and pleckstrin homology domains-containing protein 1;RAN=Ras-related Nuclear protein; TGF-β=Transforming growth factor beta. “↑”=promote; “↓”=inhibit.

on the quality of life [1, 2]. Unfortunately, the treatment strategies for psoriasis are not effective sufficiently, which is, at least in part, due to that the molecular mechanisms underlying disease pathology are still largely unknown. It is now clear that microRNAs (miRNAs, miR) can regulate cell differentiation and proliferation, cytokine responses of keratinocytes, T-lymphocytes survival and activation, as well as the crosstalk between immunocytes and keratinocytes [3].The specific miRNAs profiles have been recently revealed in psoriasis [4],whereas the study for role and context of these miRNAs in psoriasis is still in its infancy.

Through a systematic review, we recently found that, among miRNAs dramatically altered in psoriasis, some candidates hold the potentials to be developed as the disease markers and therapeutic targets [5], especially four specific miRNAs, miR-31, miR-203, hsa-miR-99a and miR-125b. These four miRNAs caught our attention, since the imbalance expression between miR-31/miR203 and hsa-miR-99a/miR-125b may directly contribute to aberrant proliferation and differentiation in psoriasis. In the past, most of the studies put great efforts into mechanisms associated with one single miRNA, which leads to a lot of progress in understanding the pathogenesis of psoriasis. However, it is still difficult to understand disease pathogenesis in a systematical or comprehensive way. In this review, we discuss roles of these four specific miRNAs in pathogenesis of psoriasis and try to draw their intrinsic link in molecular mechanisms, as working on multiple molecules could be a better way to know systemic knowledge in psoriasis and thereby developing new strategies to treat this refractory disease in the future.

## RESULTS AND DISCUSSION

### Four key miRNAs were identified in psoriatic skin

Since the altered expression of miRNAs was for the first time determined in 2007, more and more cell- and region-specific miRNAs have been identified in psoriasis [1, 6-9]. However, the roles of miRNAs in psoriasis lesions have not been fully elucidated. In our last systemic review, we included any studies in which role of miRNAs in psoriasis was examined in relation to disease pathogenesis, diagnosis, and treatment. Therefore, we have identified the specific miRNAs profiles in human psoriatic skin, blood, and hair samples. Meanwhile, several unique miRNAs in inflammatory responses and immune dysfunction, as well as hyper-proliferative disorders of psoriatic lesions have been revealed [5]. Among these miRNAs, four miRNAs (miR-31, miR-203, hsa-miR-99a andmiR-125b) were dramatically and specifically altered in psoriatic skin and thereby exerting synergistic effects in increasing the severity of psoriasis. In order to reveal the mechanisms associated with these four miRNAs, we systematically reviewed and analyzed the related literatures in this study. The functions, target genes and the other related molecules of these four miRNAs were subsequently summarized in Table 1. The detailed information will be discussed below.

## MiR-31

MiR-31 expression is dramatically increased in psoriasis lesional skin, as compared to healthy skin and psoriasis nonlesional skin [10]. Further studies showed that in both psoriasis patients and psoriatic murine model, keratinocytes are major cell types responsible for the increased expression of miR-31 in psoriatic skin [10]. Moreover, miR-31 has been implicated as an important regulator of keratinocyte biology in psoriasis, e.g. inflammatory response, proliferation and differentiation [10-12]. In the current work, cytokines (tumor necrosis factor [TNF]- $\alpha$ , interleukin [IL]-22, transforming growth factor [TGF]- $\beta$ 1, IL-6, IL-20, interferon [IFN]- $\gamma$ , and granulocyte-macrophage colony-stimulating factor [GM-CSF]), growth factors (epidermal growth factor and keratinocyte growth factor), and factors modulating cell differentiation were studied through the systematically review to see if they could regulate the expression of miR-31, the result turned out that only type 1 of transforming growth factor beta (TGF- $\beta$ 1) functions as a potent regulator of miR-31 in primary keratinocytes [10]. It is

well known that TGF- $\beta$ 1 expression is increased in the epidermis and serum of psoriasis patients [13-15]. The overexpression of miR-31 triggered by TGF- $\beta$ 1 may be mostly through the activation of necrosis factor (NF)- $\kappa$ B, which is extensively involved in inflammation process including psoriatic pathogenesis [10]. In addition, another research found that IL-1 $\alpha$ , IL-6, IL-17A, TNF- $\alpha$ , IFN- $\gamma$  or IL-22 directly or indirectly activate the NF- $\kappa$ B signaling pathway, which further mediates miR-31 expression in keratinocytes [12]. Therefore, NF- $\kappa$ B is believed to have a crucial role in regulating miR-31 induction in psoriatic keratinocytes.

Moreover, protein phosphatase 6 (ppp6c) [12], serine/threonine kinase 40 (STK40) [10], factor-inhibiting hypoxia inducible factor 1 (FIH-1) [11], and epithelial membrane protein 1 (EMP-1) [16] have been reported as the direct target genes of miR-31. ppp6c, an inhibitor of the G1-S phase transition in the cell cycle, is diminished in human psoriatic epidermis. The inhibition of ppp6c is functionally essential for the biological effects mediated by miR-31, as evidenced by the fact that, by suppressing ppp6c, miR-31 contributes to basal

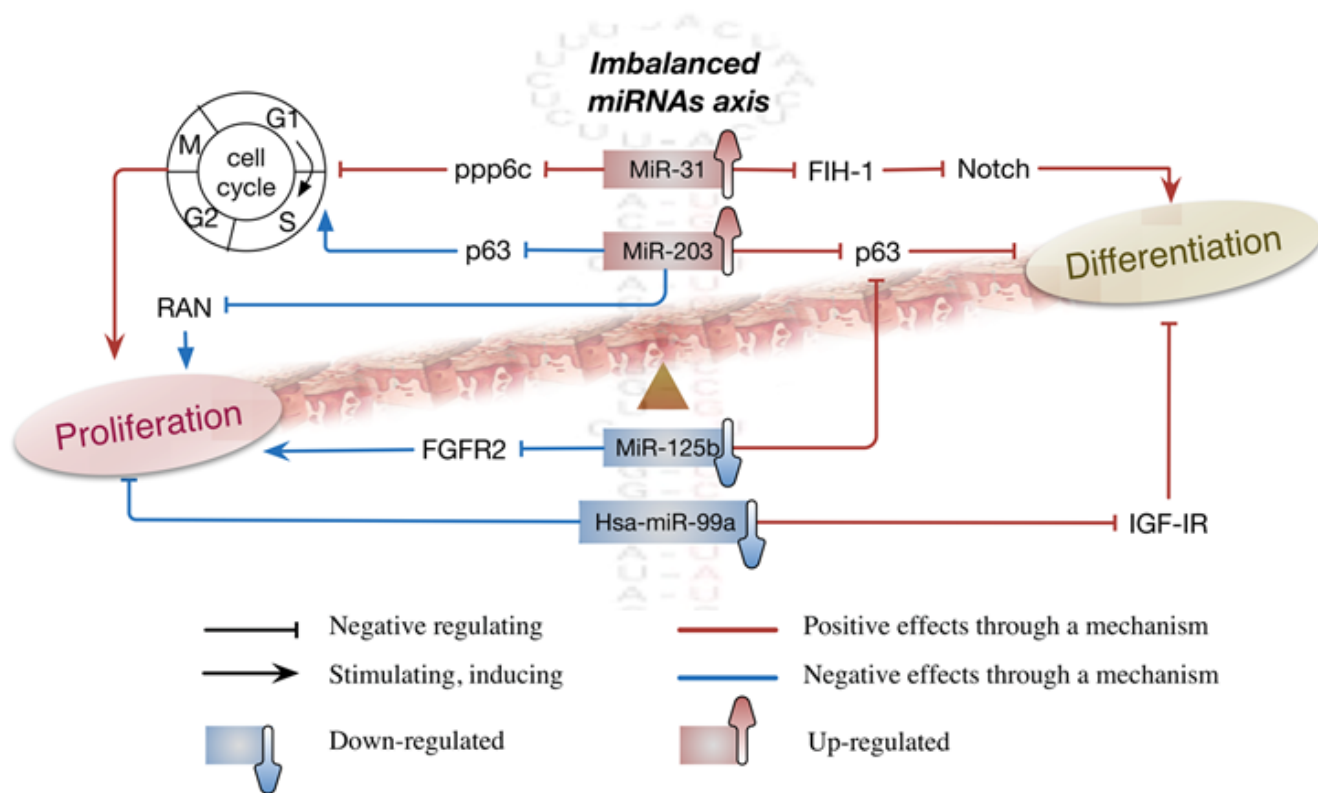

**Figure 1: The imbalanced miRNAs axis consisted of upregulated pair of miR-31/miR-203 and down regulated pair of hsa-miR-99a/miR-125b plays a critical role in controlling proliferation and differentiation in psoriatic keratinocytes.** This imbalance between miR-31/miR-203 and hsa-miR-99a/miR-125b is like “Yin” and “Yang” in Chinese medicine, which means these two pairs of miRNAs are opposite or contrary in expression, but they are actually complementary, interconnected, and interdependent in the development of psoriasis pathogenesis. Abbreviations: ppp6c = protein phosphatase 6; FIH-1 = factor-inhibiting hypoxia-inducible factor 1; IGF-1R = insulin-like growth factor 1 receptor; FGFR2 = fibroblast growth factor receptor 2; p63 = protein 63; SOCS-3 = suppressor of cytokine signaling 3; PI3K = Phosphatidylinositol-4,5-bisphosphate 3-kinase; JAK = Janus Kinase; RAN = Ras-related Nuclear protein.

keratinocyte proliferation and epidermal hyperplasia [12]. STK40 is another direct target of miR-31, and also it is a negative modulator of NF- $\kappa$ B signaling [10]. Therefore, possibly through inhibiting STK40, miR-31 activates NF- $\kappa$ B signaling, which further contributes to keratinocytes proliferation and maintains inflammation of psoriatic skin. With regard to FIH-1, it has been demonstrated that FIH-1 is markedly increased in psoriasis and can be suppressed by miR-31 *via* binding to the 3' site of FIH-1 mRNA [11]. FIH-1 is able to promote keratinocyte proliferation [11], while on the other hand loss of FIH-1 promotes keratinocyte differentiation *via* a coordinate increase in Notch signaling [11], which is one of the key determinants controlling epithelial growth/differentiation [6, 17, 18]. Recently, a new research identified EMP-1 as a direct target of miR-31 in keratinocytes [16], which provides an explanation for a study showing that miR-31 unblocks the EMP-1-dependent repression of keratinocyte proliferation and migration. Collectively, these findings have established miR-31 as a multifunctional miRNA

playing pro-proliferative, pro-differentiative and pro-inflammatory roles in epidermal keratinocytes.

### MiR-203

MiR-203 is the most abundant keratinocyte-specific miRNA in the epidermis [1], and it is highly and selectively expressed in mouse and human keratinocytes [19]. In fact, because of the ability to stop proliferation and block cell cycle at the G0/G1 phase, miR-203 is described as a 'stem-ness' repressor and an indirect promoter of differentiation process in epidermal keratinocytes [20]. The first reported target gene of miR-203 is suppressor of cytokine signaling 3 (SOCS-3), which is an important molecule in psoriatic plaque development [1, 21]. SOCS-3 is essentially involved in a negative feedback loop in cytokine signaling, and through this feedback loop STAT3 activation is suppressed in keratinocytes [22, 23]. Of note, STAT3 is Th17-related cytokines and positively correlated with expression of Th17 in psoriasis [22].

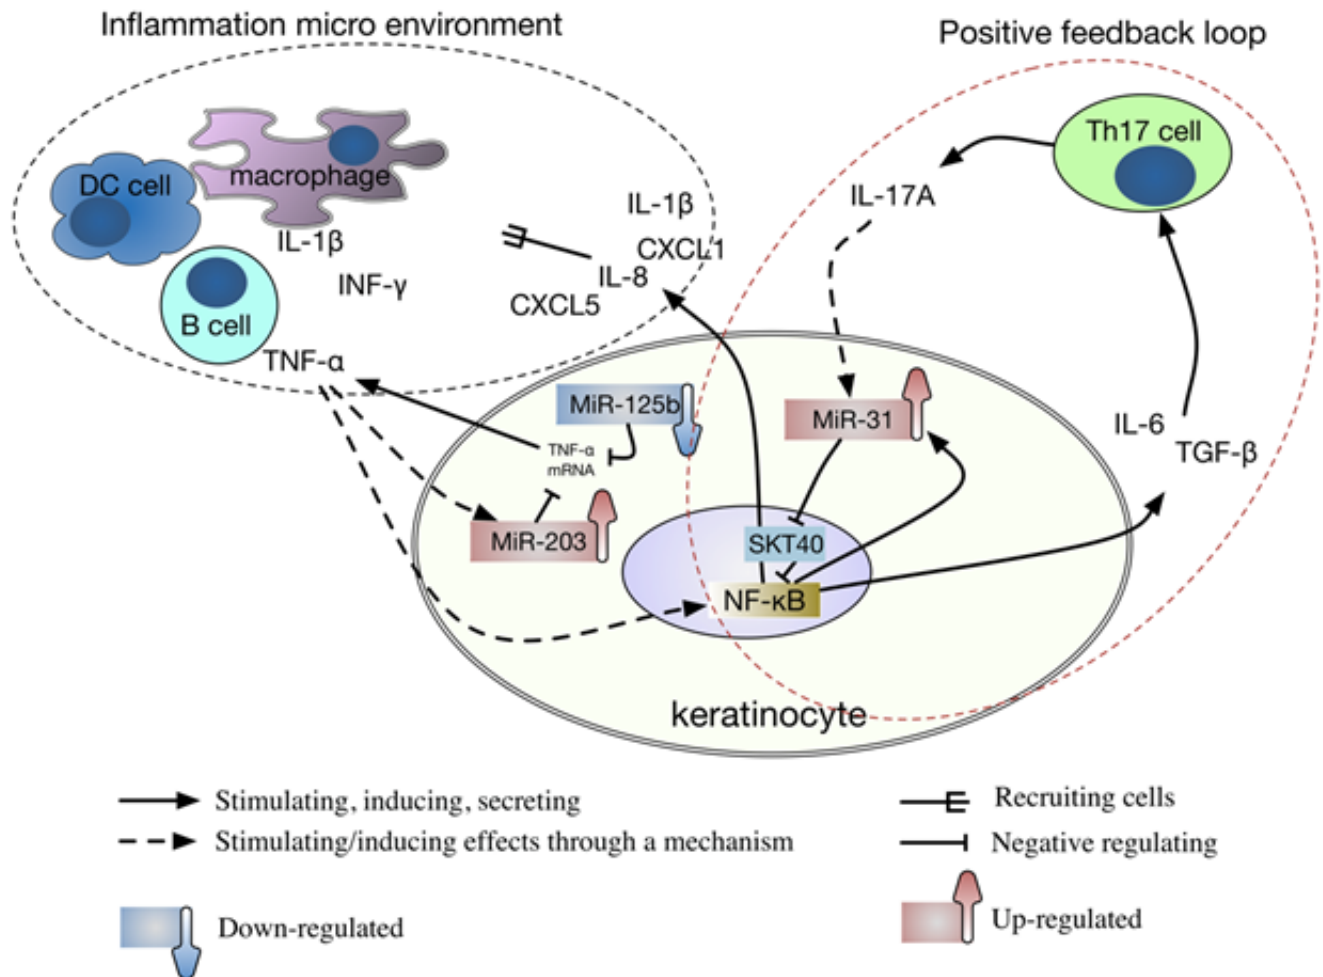

**Figure 2: Crosstalk between imbalanced miRNAs axis and key cytokines.** Abbreviations: DC = Dendritic; Th17 = T helper type-17; STK40 = serine/threonine kinase 40; NF- $\kappa$ B = Nuclear factor kappa B; CXCLs = chemokine (C-X-C motif) ligands; IL = interleukin; TGF- $\beta$  = Transforming growth factor beta; IFN- $\gamma$  = Interferon gamma; TNF = tumor necrosis factor.

Apparently, therefore, the up-regulation of miR-203 leads to decreased SOCS-3 levels in psoriatic skin, which may consequently result in sustained activation of the STAT3 signaling pathway. Through this mechanism, miR-203 is able to resist the development of psoriatic plaques as well as contribute to increased/prolonged skin inflammation in response to T cell-derived cytokines.

Another target gene p63 can be specifically suppressed by miR-203 *via* binding to 3'-UTRs region of mRNA [20, 24]. As a member of the p53 family, p63 is able to regulate keratinocyte differentiation and epidermal stratification *via* the transactivation of the Notch ligand JAGGED-1 and the control of IKK $\alpha$  (I $\kappa$ B kinase- $\alpha$ ) expression [25-32]. Apart from SOCS-3 and p63, two other miR-203 target genes Ras-related Nuclear protein (RAN) and Ras-associated and pleckstrin homology domains-containing protein 1 (RAPH1) has been recently identified [20, 33-35]. RAN is a member of the small GTP-binding protein (G-protein) superfamily and it was reported to be associated with cell proliferation and survival, nucleocytoplasmic transport and cytoskeletal dynamics [36-38]. RAPH1 is a regulator of actin dynamics taking part in cytoskeleton remodeling complexes [39]. Collectively, by analyzing functions of its target genes, the role of miR-203 in psoriatic keratinocytes can be interpreted as anti-proliferative, pro-inflammatory and pro-differentiative in psoriatic keratinocytes.

### Hsa-miR-99a

Hsa-miR-99a has been identified as a strongest down-regulated miRNA in psoriatic skin [9], while information about the role of this miRNA is limited. By bioinformatic prediction and experimental validation using microarray and polyribosomal loading analysis, Sun et al. identified that type 1 receptor of insulin-like growth factor (IGF-1R) is a direct target of hsa-miR-99a [40]. Elevation of IGF-1R enhances proliferation and inhibits differentiation in the psoriatic lesion [9], since IGF-1R can lead to activation of the Ras, Raf, mitogen-activated protein kinase (MAPK) and the phosphatidylinositol 3-kinase (PI3K) pathways [41]. Intriguingly, IGF-1R signaling can up-regulate the expression of hsa-miR-99a that in turn down-regulates the expression of IGF-1R, and by this procedure cell differentiation is facilitated [9]. Taken together, hsa-miR-99a is able to block cell proliferation and drive cells toward differentiation *via* specifically targeting IGF-1R in psoriatic skin.

### MiR-125b

MiR-125b is known to be expressed in normal skin and resident cells, such as fibroblasts, keratinocytes, and melanocytes [1]. By using microarray analysis, miR-125b was found to be significantly decreased in psoriasis skin

in comparison with healthy skin [1]. Mechanism study has revealed that miR-125b suppresses psoriatic keratinocytes proliferation through inhibiting its directly target gene fibroblast growth factor receptor 2 (FGFR2), which is a receptor expressed on keratinocytes and upregulated in psoriatic lesion [15]. This study also showed that overexpression of miR-125b by transfecting with miR-125b precursor RNA in primary human keratinocytes not only suppressed cells proliferation but also induced the expression of several known differentiation markers. However, knocking down FGFR2 using siRNA method can only suppressed keratinocyte proliferation, but did not enhance differentiation, suggesting that the pro-differentiative effect of miR-125b is not related to FGFR2 [15]. In addition to FGFR2, studies also identified p63 and Notch1 as potential targets of miR-125b in epidermis cells. Both Notch1 and p63 are key molecules for regulatory signaling that controls keratinocyte differentiation and proliferation [27, 42]. According to these observations, it is reasonable to conclude that miR-125b holds a role to protect skin from psoriasis, which is in agreement with the downregulation of miR-125b in psoriasis skin.

### Imbalance miRNAs axis: miR-31/miR-203 and hsa-miR-99a/miR-125b

Taken together, we found that each of these miRNAs does not act alone but rather work in concert with other factors. Apparently, upregulation of miR-31/miR-203 and downregulation of hsa-miR-99a/miR-125b work together in concert to form an imbalanced miRNAs axis, which contributes to the intense proliferation and abnormal differentiation of psoriatic keratinocytes through a signal network. This mechanism was depicted in Figure 1.

Briefly, in a synergistic manner, all of these four miRNAs contribute to cell differentiation by regulating the expression of FIH-1, p63 and IGF-1R. However, such a synergistic effect is weakened by decreased expression of hsa-miR-99a/miR-125b in psoriatic lesions. In addition, the downregulated pair of hsa-miR-99a/miR-125b plays a positive role in cell proliferation, which may cause imbalance between proliferation and differentiation of psoriatic keratinocytes, thereby contributing to psoriasis pathogenesis. Interesting, by targeting to ppp6c and p63 respectively, the upregulated pair of miR-31/miR-203 exert an opposite effect on cell cycle and then show pro-proliferation and anti-proliferation separately. Although these two miRNAs are positive in cell differentiation and contrary in cell proliferation, both can facilitate inflammation which is very important for the development of psoriasis pathogenesis. Therefore, undoubtedly, the imbalanced miRNAs axis, consisted of upregulated pair of miR-31/miR-203 and down regulated pair of hsa-miR-99a/miR-125b, plays a critical role in controlling proliferation and differentiation in psoriatic keratinocytes.

## PRISMA 2009 Flow Diagram

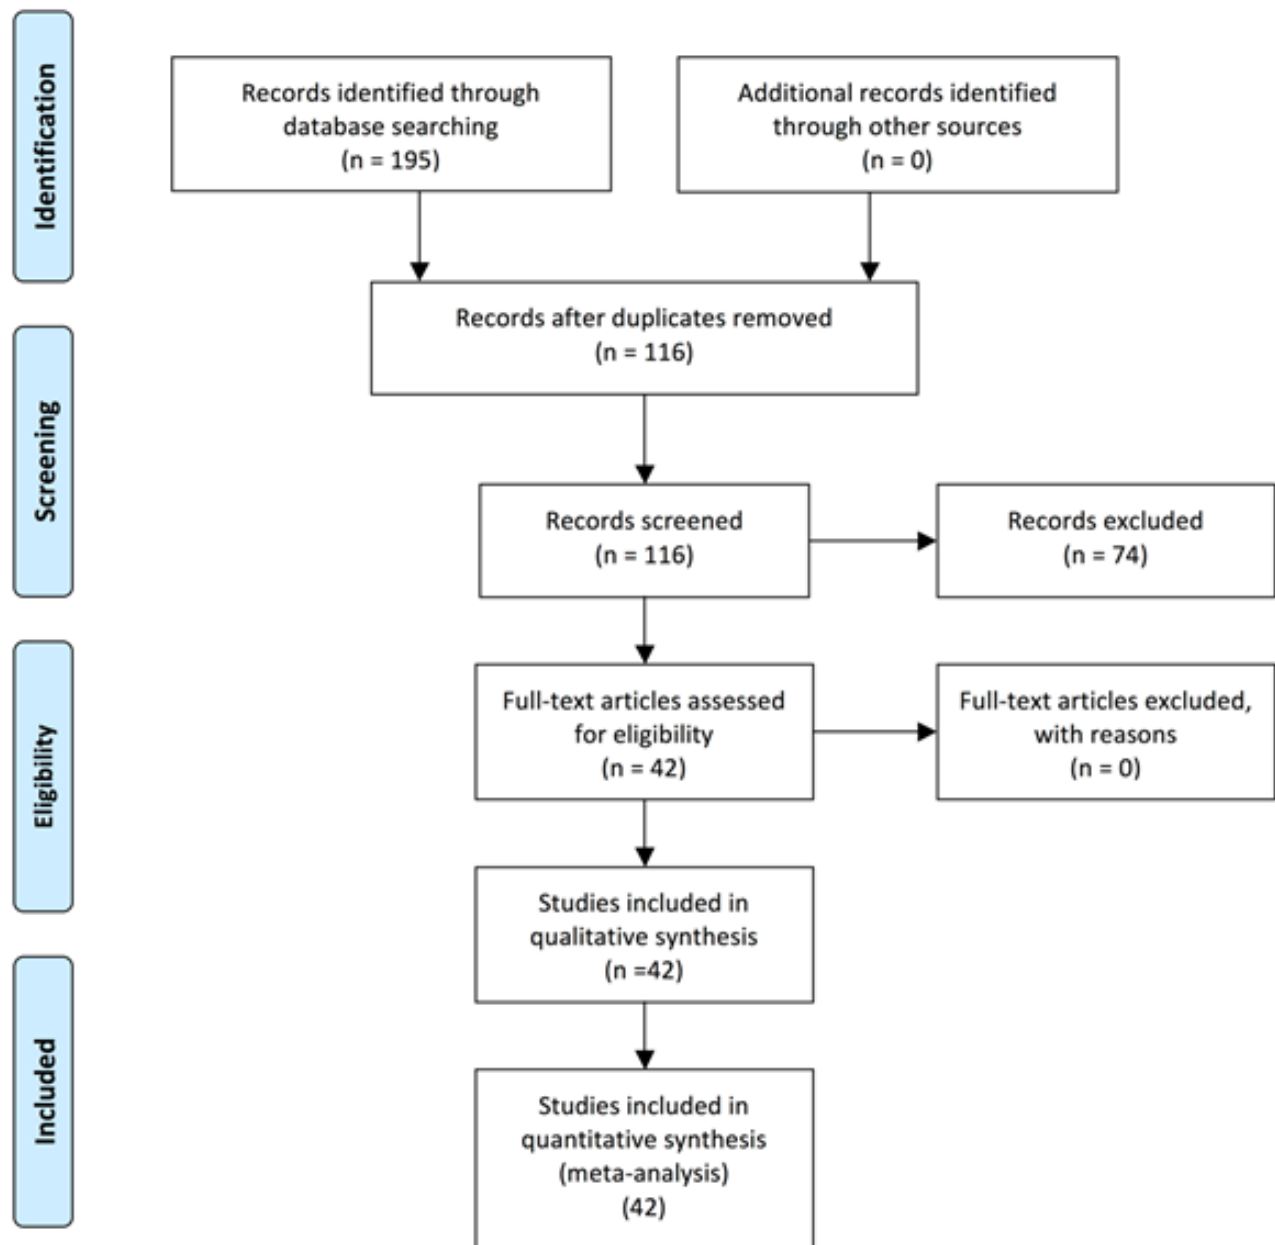

From: Moher D, Liberati A, Tetzlaff J, Altman DG, The PRISMA Group (2009). Preferred Reporting Items for Systematic Reviews and Meta-Analyses: The PRISMA Statement. PLoS Med 6(6): e1000097. doi:10.1371/journal.pmed1000097

For more information, visit [www.prisma-statement.org](http://www.prisma-statement.org).

Figure 3: Methodology schematic for systematic review.

## Crosstalk between imbalanced miRNAs axis and key cytokines

It is now widely accepted that close interdependence between keratinocytes and immune cells leads to epidermal pathological changes in psoriasis. In inflammatory microenvironment of psoriatic lesions, inflammatory factors, such as TNF- $\alpha$ , IL-17A and TGF- $\beta$ , are secreted by keratinocytes and play a prominent role in recruitment and retention of inflammatory cells into psoriatic lesions [10, 43]. Immune cell-derived cytokines, in turn, act on keratinocytes to promote the expression of inflammatory genes which contribute to keratinocyte proliferation and impair keratinocyte differentiation. Importantly, crosstalk between miRNAs and inflammatory factors plays an important role in these biological processes. For example, TNF- $\alpha$  induces high expression of miR-203 [43], but unfortunately the increased miR-203 in turn inhibits TNF- $\alpha$  expression at transcriptional level [44]. The question is raised as to why both TNF- $\alpha$  and miR-203 are increased in psoriatic lesions? The imbalanced miRNAs axis could give an explanation (Figure 2). In contrast to miR-203, miR-125b is downregulated in psoriasis, which may partially bear responsibility for the elevated production of TNF- $\alpha$ , since miR-125b targets TNF- $\alpha$  directly at post-transcriptional level [45].

For crosstalk between miRNAs and inflammatory factors, we give another example as follows (Figure 2): In keratinocyte, TGF- $\beta$  and IL-6 can induce miR-31 that is capable of inducing the production of IL-1 $\beta$ , chemokine (C-X-C motif) ligand 1 (CXCL1)/growth-related oncogene-a, CXCL5/epithelial-derived neutrophil-activating peptide 78, and CXCL8/IL-8 [10, 12]. The mechanism for induction of miR-31 by TGF- $\beta$  is recognized as being, at least in part, attributable to the critical role of TGF- $\beta$  in the differentiation of type 17 helper T-cells (Th17), which is known to play an essential pathogenic role in psoriasis [46]. IL-17A, the main cytokine produced by Th17 cells, is most effective in triggering downstream genes activation and directly or indirectly activates the NF- $\kappa$ B signaling pathway to promote miR-31 expression in keratinocytes [12]. Meanwhile, miR-31 directly targets STK40, which can inhibit TNF-induced NF- $\kappa$ B activation [13], thereby strengthening the IL-17A effect. Therefore, the crosstalk between inflammatory factors and miR-31 constitutes a positive feedback loop, which contributes to the persistence of inflammation micro environment in psoriatic lesions.

## CONCLUSIONS

Unlike other studies focusing on one single molecular, we studied the roles and intrinsic link of four miRNAs (miR-31, hsa-miR-99a, miR-125b and miR-203)

that are dramatically and specifically altered in psoriatic skin in this work. The dramatical over-expression of miR-31 and miR-203 accompany with extreme downregulation of hsa-miR-99a and miR-125b form an imbalanced miRNAs axis, which plays a critical role in controlling proliferation and differentiation of psoriasis keratinocytes. In addition, the crosstalk between inflammatory factors and this imbalanced miRNAs axis is crucially involved in inflammation micro environment of psoriatic lesions, which further facilitates the development of psoriasis pathogenesis. This imbalance is like “Yin” and “Yang” in Chinese medicine, which means pairs of miR-31/miR-203 and hsa-miR-99a/miR-125b are opposite or contrary in expression, but they are actually complementary, interconnected, and interdependent in the development of psoriasis pathogenesis. Psoriasis is a complex and high heterogeneity disease. Therefore, further studies on this imbalanced miRNAs axis could be a better way to, not comprehensively but to some extent systemically, understand pathogenesis of psoriasis, and thereby developing new strategies to treat this refractory disease in the future.

## MATERIALS AND METHODS

This systematic review is reported according to the Preferred Reporting Items for Systematic Reviews and Meta-Analyses statement (PRISMA) (Figure 3) [14].

### Search methods

We searched the related articles indexed in PubMed (MEDLINE) database using Title/Abstract words ([“microRNA-31/99a/125b/203” or “miR-31/99a/125b/203”] and [“psoriasis” or “keratinocyte” or “epithelium” or “skin”]) from inception up to July 2016. The references in articles selected were screened carefully. Therefore any researches matching the inclusion criteria in this study could be analyzed. The additional reports from the reference list of seminal reviews were also identified. There are no limitations imposed on language, and three independent investigators conducted the searching process.

### Study selection

Inclusion criteria: All literature focusing on the mechanism of miR-31, miR-203, hsa-miR-99a and miR-125b were considered. No restriction for investigated subjects. In order to achieve the object, the reports including case report, review, meta-analysis and clinical trials were excluded. Three independent investigators conducted the searching process. Experts in the field of miRNAs and dermatology were involved in discussion and analyzing process.

## ACKNOWLEDGMENTS

We thank for Prof. Boudewijn Burgering's group for their suggestions in writing this review.

## CONFLICTS OF INTEREST

No potential conflicts of interest were disclosed.

## GRANT SUPPORT

This study was supported by National Natural Science Foundation of China (No. 81473681), China Postdoctoral Science Foundation (No. 2014M562163 and No. 2015T80900), as well as Chinese Medical Science and Technology research funding from Guangdong Provincial Hospital of Chinese Medicine (No. YN2014ZH04).

## REFERENCES

1. Sonkoly E, Wei T, Janson PC, Saaf A, Lundeberg L, Tengvall-Linder M, Norstedt G, Alenius H, Homey B, Scheynius A, Stahle M and Pivarcsi A. MicroRNAs: novel regulators involved in the pathogenesis of psoriasis? *PLoS one*. 2007; 2:e610.
2. Zhao YK, Zhang YQ, Wang F, Wu HH, Luo ZY, Luo DQ and Chen WN. Developing Shingles-Induced Koebner Phenomenon in a Patient With Psoriasis: A Case Report. *Medicine*. 2015; 94:e1009.
3. Pivarcsi A, Stahle M and Sonkoly E. Genetic polymorphisms altering microRNA activity in psoriasis—a key to solve the puzzle of missing heritability? *Experimental dermatology*. 2014; 23:620-624.
4. Jinnin M. [microRNA in autoimmune disorders]. [Article in Japanese]. *Nihon Rinsho Men'eki Gakkai kaishi*. 2011; 34:439-446.
5. Huang RY, Li L, Wang MJ, Chen XM, Huang QC and Lu CJ. An Exploration of the Role of MicroRNAs in Psoriasis: A Systematic Review of the Literature. *Medicine*. 2015; 94:e2030.
6. Sonkoly E, Stahle M and Pivarcsi A. MicroRNAs: novel regulators in skin inflammation. *Clinical and experimental dermatology*. 2008; 33:312-315.
7. Zibert JR, Lovendorf MB, Litman T, Olsen J, Kaczkowski B and Skov L. MicroRNAs and potential target interactions in psoriasis. *Journal of dermatological science*. 2010; 58:177-185.
8. Joyce CE, Zhou X, Xia J, Ryan C, Thrash B, Menter A, Zhang W and Bowcock AM. Deep sequencing of small RNAs from human skin reveals major alterations in the psoriasis miRNAome. *Human molecular genetics*. 2011; 20:4025-4040.
9. Lerman G, Avivi C, Mardoukh C, Barzilai A, Tessone A, Gradus B, Pavlotsky F, Barshack I, Polak-Charcon S, Orenstein A, Hornstein E, Sidi Y and Avni D. MiRNA expression in psoriatic skin: reciprocal regulation of hsa-miR-99a and IGF-1R. *PLoS one*. 2011; 6:e20916.
10. Xu N, Meisgen F, Butler LM, Han G, Wang XJ, Soderberg-Naucler C, Stahle M, Pivarcsi A and Sonkoly E. MicroRNA-31 is overexpressed in psoriasis and modulates inflammatory cytokine and chemokine production in keratinocytes via targeting serine/threonine kinase 40. *Journal of immunology*. 2013; 190:678-688.
11. Peng H, Kaplan N, Hamanaka RB, Katsnelson J, Blatt H, Yang W, Hao L, Bryar PJ, Johnson RS, Getsios S, Chandel NS and Lavker RM. microRNA-31/factor-inhibiting hypoxia-inducible factor 1 nexus regulates keratinocyte differentiation. *Proceedings of the National Academy of Sciences of the United States of America*. 2012; 109:14030-14034.
12. Yan S, Xu Z, Lou F, Zhang L, Ke F, Bai J, Liu Z, Liu J, Wang H, Zhu H, Sun Y, Cai W, Gao Y, Su B, Li Q, Yang X, et al. NF-kappaB-induced microRNA-31 promotes epidermal hyperplasia by repressing protein phosphatase 6 in psoriasis. *Nature communications*. 2015; 6:7652.
13. Huang J, Teng L, Liu T, Li L, Chen D, Li F, Xu LG, Zhai Z and Shu HB. Identification of a novel serine/threonine kinase that inhibits TNF-induced NF-kappaB activation and p53-induced transcription. *Biochemical and biophysical research communications*. 2003; 309:774-778.
14. Creighton CJ, Fountain MD, Yu Z, Nagaraja AK, Zhu H, Khan M, Olokpa E, Zariff A, Gunaratne PH, Matzuk MM and Anderson ML. Molecular profiling uncovers a p53-associated role for microRNA-31 in inhibiting the proliferation of serous ovarian carcinomas and other cancers. *Cancer research*. 2010; 70:1906-1915.
15. Xu N, Brodin P, Wei T, Meisgen F, Eidsmo L, Nagy N, Kemeny L, Stahle M, Sonkoly E and Pivarcsi A. MiR-125b, a microRNA downregulated in psoriasis, modulates keratinocyte proliferation by targeting FGFR2. *The Journal of investigative dermatology*. 2011; 131:1521-1529.
16. Li D, Li X, Wang A, Meisgen F, Pivarcsi A, Sonkoly E, Stahle M and Landen NX. MicroRNA-31 Promotes Skin Wound Healing by Enhancing Keratinocyte Proliferation and Migration. *The Journal of investigative dermatology*. 2015; 135:1676-1685.
17. Djalilian AR, Namavari A, Ito A, Balali S, Afshar A, Lavker RM and Yue BY. Down-regulation of Notch signaling during corneal epithelial proliferation. *Molecular vision*. 2008; 14:1041-1049.
18. Watt FM, Estrach S and Ambler CA. Epidermal Notch signalling: differentiation, cancer and adhesion. *Current opinion in cell biology*. 2008; 20:171-179.
19. Sun Y, Li XQ, Sahbaie P, Shi XY, Li WW, Liang DY and Clark JD. miR-203 regulates nociceptive sensitization after incision by controlling phospholipase A2 activating protein expression. *Anesthesiology*. 2012; 117:626-638.
20. Lena AM, Shalom-Feuerstein R, Rivetti di Val Cervo P,



- Aberdam D, Knight RA, Melino G and Candi E. miR-203 represses 'stemness' by repressing DeltaNp63. Cell death and differentiation. 2008; 15:1187-1195.
21. Kubo M, Hanada T and Yoshimura A. Suppressors of cytokine signaling and immunity. Nature immunology. 2003; 4:1169-1176.
  22. Sano S, Chan KS, Carbajal S, Clifford J, Peavey M, Kiguchi K, Itami S, Nickoloff BJ and DiGiovanni J. Stat3 links activated keratinocytes and immunocytes required for development of psoriasis in a novel transgenic mouse model. Nature medicine. 2005; 11:43-49.
  23. Lowes MA, Bowcock AM and Krueger JG. Pathogenesis and therapy of psoriasis. Nature. 2007; 445:866-873.
  24. Jackson SJ, Zhang Z, Feng D, Flagg M, O'Loughlin E, Wang D, Stokes N, Fuchs E and Yi R. Rapid and widespread suppression of self-renewal by microRNA-203 during epidermal differentiation. Development. 2013; 140:1882-1891.
  25. Barton CE, Johnson KN, Mays DM, Boehnke K, Shyr Y, Boukamp P and Pietenpol JA. Novel p63 target genes involved in paracrine signaling and keratinocyte differentiation. Cell death & disease. 2010; 1:e74.
  26. Borrelli S, Candi E, Hu B, Dolfini D, Ravo M, Grober OM, Weisz A, Dotto GP, Melino G, Vigano MA and Mantovani R. The p63 target HBPI is required for skin differentiation and stratification. Cell death and differentiation. 2010; 17:1896-1907.
  27. Candi E, Terrinoni A, Rufini A, Chikh A, Lena AM, Suzuki Y, Sayan BS, Knight RA and Melino G. p63 is upstream of IKK alpha in epidermal development. Journal of cell science. 2006; 119:4617-4622.
  28. Masse I, Barbolat-Boutrand L, Molina M, Berthier-Vergnes O, Joly-Tonetti N, Martin MT, Caron de Fromental C, Kanitakis J and Lamartine J. Functional interplay between p63 and p53 controls RUNX1 function in the transition from proliferation to differentiation in human keratinocytes. Cell death & disease. 2012; 3:e318.
  29. Okuyama R, Tagami H and Aiba S. Notch signaling: its role in epidermal homeostasis and in the pathogenesis of skin diseases. Journal of dermatological science. 2008; 49:187-194.
  30. Senoo M, Pinto F, Crum CP and McKeon F. p63 Is essential for the proliferative potential of stem cells in stratified epithelia. Cell. 2007; 129:523-536.
  31. Straub WE, Weber TA, Schafer B, Candi E, Durst F, Ou HD, Rajalingam K, Melino G and Dotsch V. The C-terminus of p63 contains multiple regulatory elements with different functions. Cell death & disease. 2010; 1:e5.
  32. Talos F, Wolff S, Beyer U, Dobbstein M and Moll UM. Brdm2 - an aberrant hypomorphic p63 allele. Cell death and differentiation. 2010; 17:184-186.
  33. Yi R, Poy MN, Stoffel M and Fuchs E. A skin microRNA promotes differentiation by repressing 'stemness'. Nature. 2008; 452:225-229.
  34. Saini S, Majid S, Yamamura S, Tabatabai L, Suh SO, Shahryari V, Chen Y, Deng G, Tanaka Y and Dahiya R. Regulatory Role of mir-203 in Prostate Cancer Progression and Metastasis. Clinical cancer research. 2011; 17:5287-5298.
  35. Viticchie G, Lena AM, Latina A, Formosa A, Gregersen LH, Lund AH, Bernardini S, Mauriello A, Miano R, Spagnoli LG, Knight RA, Candi E and Melino G. MiR-203 controls proliferation, migration and invasive potential of prostate cancer cell lines. Cell cycle. 2011; 10:1121-1131.
  36. Rensen WM, Mangiacasale R, Ciciarello M and Lavia P. The GTPase Ran: regulation of cell life and potential roles in cell transformation. Frontiers in bioscience. 2008; 13:4097-4121.
  37. Yudin D and Fainzilber M. Ran on tracks—cytoplasmic roles for a nuclear regulator. Journal of cell science. 2009; 122:587-593.
  38. Jeon H, Zheng LT, Lee S, Lee WH, Park N, Park JY, Heo WD, Lee MS and Suk K. Comparative analysis of the role of small G proteins in cell migration and cell death: cytoprotective and promigratory effects of RalA. Experimental cell research. 2011; 317:2007-2018.
  39. Lafuente EM, van Puijenbroek AA, Krause M, Carman CV, Freeman GJ, Berezovskaya A, Constantine E, Springer TA, Gertler FB and Boussiotis VA. RIAM, an Ena/VASP and Profilin ligand, interacts with Rap1-GTP and mediates Rap1-induced adhesion. Developmental cell. 2004; 7:585-595.
  40. Sun D, Lee YS, Malhotra A, Kim HK, Matecic M, Evans C, Jensen RV, Moskaluk CA and Dutta A. miR-99 family of MicroRNAs suppresses the expression of prostate-specific antigen and prostate cancer cell proliferation. Cancer research. 2011; 71:1313-1324.
  41. Baserga R, Peruzzi F and Reiss K. The IGF-1 receptor in cancer biology. International journal of cancer. 2003; 107:873-877.
  42. Dotto GP. Notch tumor suppressor function. Oncogene. 2008; 27:5115-5123.
  43. Bracke S, Desmet E, Guerrero-Aspizua S, Tjabringa SG, Schalkwijk J, Van Gele M, Carretero M and Lambert J. Identifying targets for topical RNAi therapeutics in psoriasis: assessment of a new in vitro psoriasis model. Archives of dermatological research. 2013; 305:501-512.
  44. Primo MN, Bak RO, Schibler B and Mikkelsen JG. Regulation of pro-inflammatory cytokines TNFalpha and IL24 by microRNA-203 in primary keratinocytes. Cytokine. 2012; 60:741-748.
  45. Tili E, Michaille JJ, Cimino A, Costinean S, Dumitru CD, Adair B, Fabbri M, Alder H, Liu CG, Calin GA and Croce CM. Modulation of miR-155 and miR-125b levels following lipopolysaccharide/TNF-alpha stimulation and their possible roles in regulating the response to endotoxin shock. Journal of immunology. 2007; 179:5082-5089.
  46. Volpe E, Servant N, Zollinger R, Bogiatzi SI, Hupe

P, Barillot E and Soumelis V. A critical function for transforming growth factor-beta, interleukin 23 and proinflammatory cytokines in driving and modulating human T(H)-17 responses. *Nature immunology*. 2008; 9:650-657.
